# Supplementary material for: Laminin-coated nerve guidance conduits based on poly(l-lactide-co-glycolide) fibers and yarns for promoting Schwann cells’ proliferation and migration
Source: Royal Society of Chemistry journal article supplement (doi:10.1039/c6tb03330j), 2017-01-01
Supplement: c6tb03330j1.pdf [file c6tb03330j1.pdf]

## **Supplementary Information**

### **Laminin-coated Nerve Guidance Conduits Based on Poly(L-lactide-co-glycolide) Fibers and Yarns for Promoting Schwann Cells Proliferation and Migration**

*Tong Wu, Dandan Li, Yuanfei Wang, Binbin Sun, Dawei Li, Yosry Morsi, Hany El-Hamshary, Salem S. Al-Deyab, Xiumei Mo*

Table S1 Atomic ratios of carbon, oxygen, and nitrogen on the surface of PLGA fibers or yarns with physical adsorbed laminin by X-ray photoelectron spectrometry

| Samples                    | PLGA fibers with physical adsorbed laminin | PLGA yarns with physical adsorbed laminin |
|----------------------------|--------------------------------------------|-------------------------------------------|
| C atomic concentration (%) | 62.72                                      | 64.37                                     |
| N atomic concentration (%) | 0.67                                       | 0.36                                      |
| O atomic concentration (%) | 36.61                                      | 35.72                                     |

Table S2 The amounts of physical adsorbed laminin on different samples

| Samples                                        | PLGA fibers with physical adsorbed laminin | PLGA yarns with physical adsorbed laminin |
|------------------------------------------------|--------------------------------------------|-------------------------------------------|
| Amounts of laminin per mg of PLGA fibers/yarns | $1.61 \pm 0.39 \mu\text{g}$                | $1.01 \pm 0.24 \mu\text{g}$               |

Table S3 The tensile stress, strain and modulus of PLGA fibers and yarns

| Samples        | Stress (MPa)     | Strain (%)         | Modulus (MPa)      |
|----------------|------------------|--------------------|--------------------|
| PLGA fibers    | $5.25 \pm 0.90$  | $292.07 \pm 10.50$ | $70.83 \pm 9.10$   |
| LC-PLGA fibers | $6.52 \pm 0.81$  | $174.38 \pm 22.79$ | $154.61 \pm 17.43$ |
| PLGA yarns     | $18.76 \pm 3.70$ | $233.62 \pm 26.48$ | $357.59 \pm 48.32$ |
| LC-PLGA yarns  | $24.08 \pm 5.01$ | $183.13 \pm 20.44$ | $697.66 \pm 92.60$ |

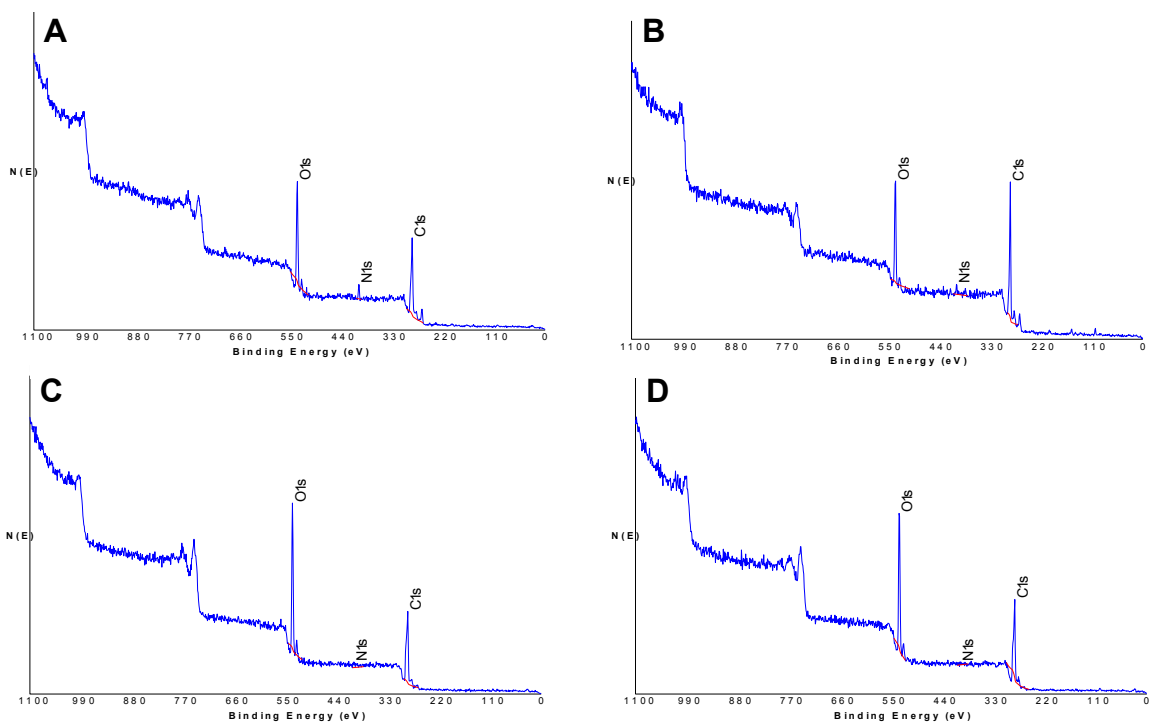

Figure S1. X-ray photoelectron spectrometry (XPS) full spectrum of (A) PLGA fibers with covalent coupling laminin, (B) PLGA yarns with covalent coupling laminin, (C) PLGA fibers with physical adsorbed laminin and (D) PLGA yarns with physical adsorbed laminin.
